# Supplementary material for: Genes Involved in Immune Reinduction May Constitute Biomarkers of Response for Metastatic Melanoma Patients Treated with Targeted Therapy
Source: MDPI journal article supplement (doi:10.3390/biomedicines10020284), 2022-01-26
Supplement: s1 [file s1]

Appendix- Supplementary Material

1. Patient Flow Chart:

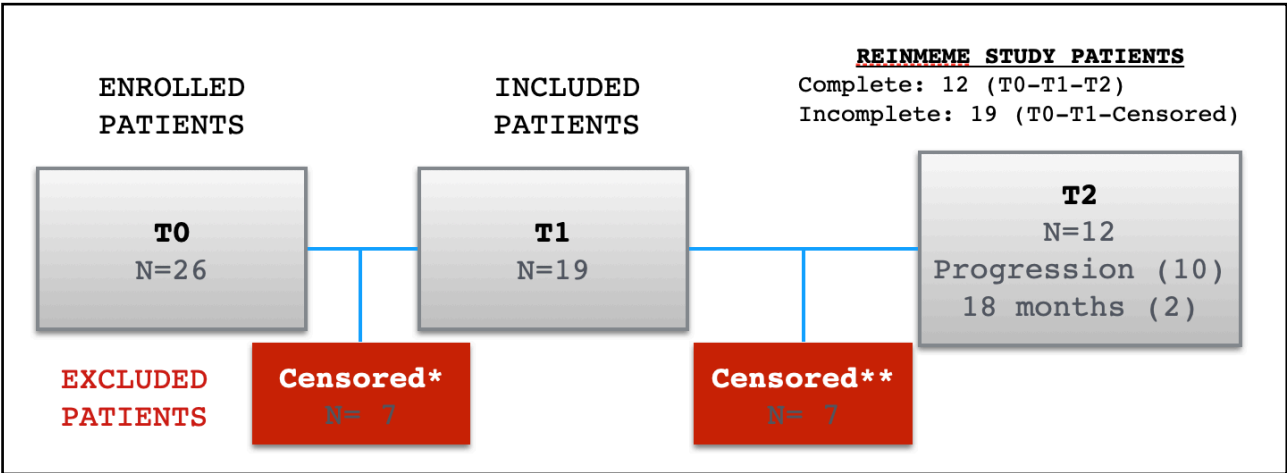

Figure S1. REINMEME STUDY. Flow chart patients.

\*Censored patients: 2 pt with technical problems with samples, non-melanoma; 2 pt did not extract the blood sample, 1 pt with falsely diagnosed metastatic melanoma (sarcoid reaction). \*\*Censored patients due to extreme clinical deterioration that conditioned their withdrawal of consent.

2. Survival analysis:

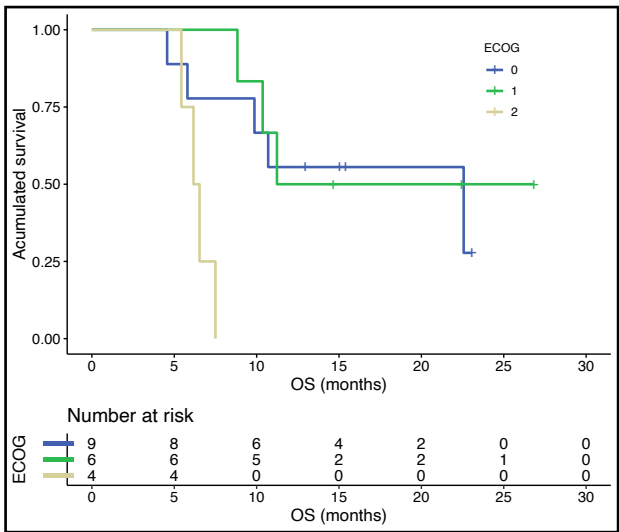

Figure S2. Kaplan-Meier Overall Survival Analysis by ECOG ( $p<0.01$ )

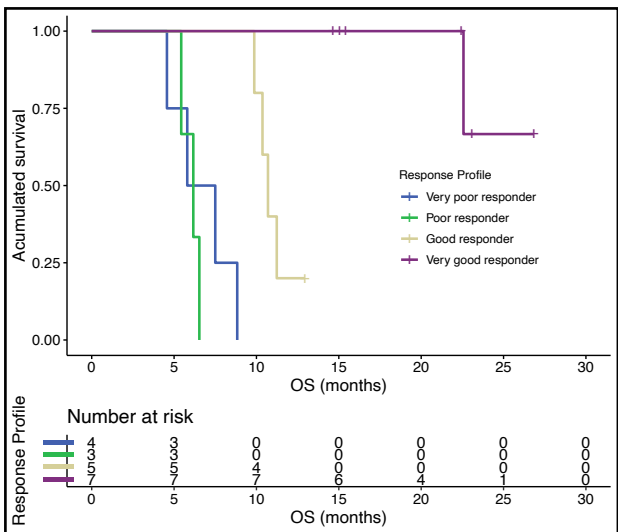

Figure S3. Kaplan-Meier Overall Survival Analysis by Response Profile ( $p<0.001$ )

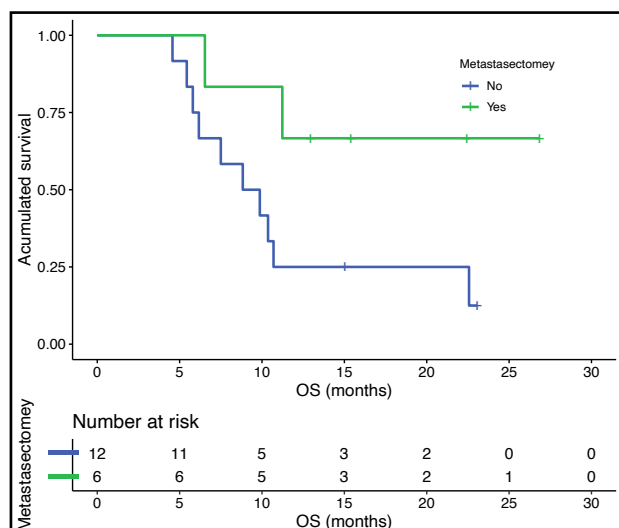

**Figure S4.** Kaplan-Meier Overall Survival Analysis by metastasectomy ( $p=0.061$ )

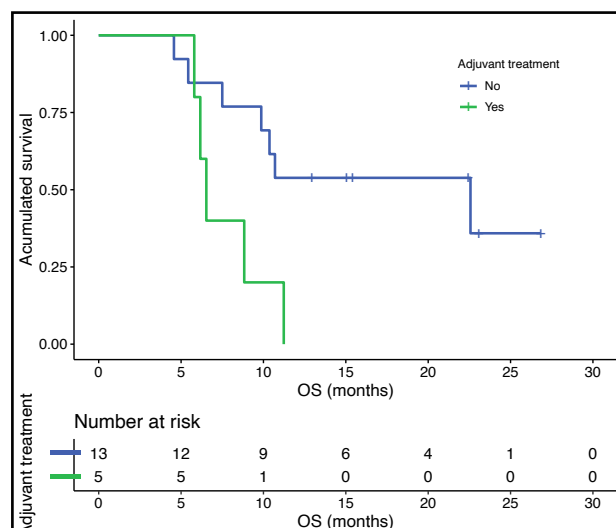

**Figure S5.** Kaplan-Meier Overall Survival Analysis by Adjuvant treatment ( $p=0.024$ )

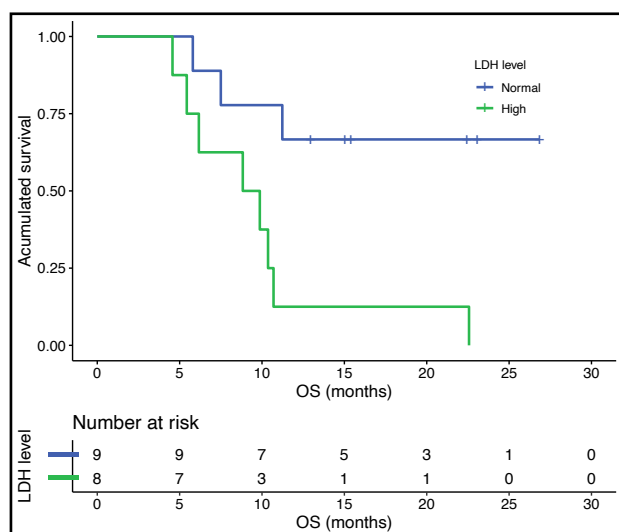

**Figure S6.** Kaplan-Meier Overall Survival Analysis by LDH ( $p=0.008$ )

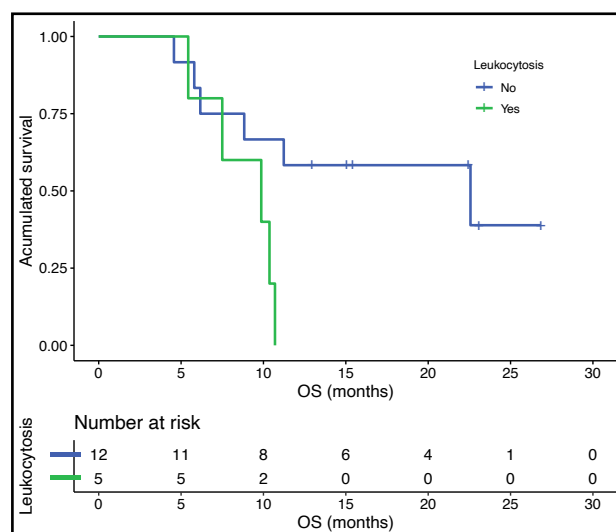

**Figure S7.** Kaplan-Meier Overall Survival Analysis by leukocytosis ( $p=0.051$ )

### 3. Tables

#### 3.1. Table S1. Univariate Analysis (OS)

| Patient features               | p           | Hazard Ratio (CI 95%) |
|--------------------------------|-------------|-----------------------|
| Gender                         | 0,461       | 1.58 (0.47 - 5.32)    |
| ECOG                           | 0,004       | 9.99 (1.61 - 62.13)   |
| Comorbidities                  |             |                       |
| Allergies                      | 0,938       | 0.94 (0.2 - 4.36)     |
| Other medical conditions       | 0,342       | Not Applicable        |
| Basal conditions               | p           | Hazard Ratio (CI 95%) |
| Previous treatment             |             |                       |
| Primary tumor resection        | 0,536       | 0.68 (0.2 - 2.29)     |
| Metastasectomy                 | 0,061       | 0.26 (0.06 - 1.19)    |
| Adjuvant treatment             | 0,024       | 3.78 (1.11 - 12.9)    |
| Analitics                      |             |                       |
| High LDH                       | 0,008       | 5.37 (1.37 - 21.13)   |
| High dNLR                      | 0,334       | 1.91 (0.5 - 7.23)     |
| Lymphocytes depletion          | 0,861       | 0.83 (0.1 - 6.61)     |
| Leucocytosis                   | 0,051       | 3.78 (0.99 - 14.4)    |
| Treatment and response         | p           | Hazard Ratio (CI 95%) |
| Type of treatment (iBRAF/iMEK) | 0,282       | 0.89 (0.26 - 3.07)    |
| Dose reduction                 | 0,181       | 0.46 (0.15 - 1.47)    |
| Toxicity                       | 0,255       | 0.19 (0.02 - 1.99)    |
| Response to treatment          | 0,198       | 0.4 (0.1 - 1.62)      |
| Tumor features                 | p value     | Hazard Ratio (CI 95%) |
| Final TNM Stage                | 0,838-0,977 | 1.17 (0.14 - 9.97)    |
| Ulceration                     | 0,581       | 1.46 (0.38 - 5.67)    |
| Primary tumor location         | 0,887       | 0.54 (0.09 - 3.29)    |
| Metastatic location            |             |                       |
| Number                         | 0,140       | 4.15 (0.53 - 32.22)   |
| CNS                            | 0,874       | 0.9 (0.24 - 3.34)     |
| Bone                           | 0,197       | 2.21 (0.64 - 7.63)    |
| BRAF mutation                  | 0,320       | Not applicable        |

#### 3.2. Table S2. Multivariate Analysis (OS)

| Clinical variables | P value | Hazard Ratio (CI 95%)  |
|--------------------|---------|------------------------|
| ECOG               | 0,5997  | 1,828 (0,192 - 17,415) |
| TNM                | 0,0721  | 0,112 (0,010 - 1,217)  |
| Metastasectomy     | 0,0516  | 0,018 (0,0003 - 1,029) |

|                      |        |                        |
|----------------------|--------|------------------------|
| Number of metastatic | 0,0649 | 39,45 (0,797-1952,9)   |
| LDH                  | 0,9823 | 0,976 (0,114-8,325)    |
| High dNLR            | 0,5459 | 1,783 (0,273-11,658)   |
| Toxicity             | 0,7481 | 1,396 (0,182 - 10,679) |

### 3.3. Coexpression Analysis81

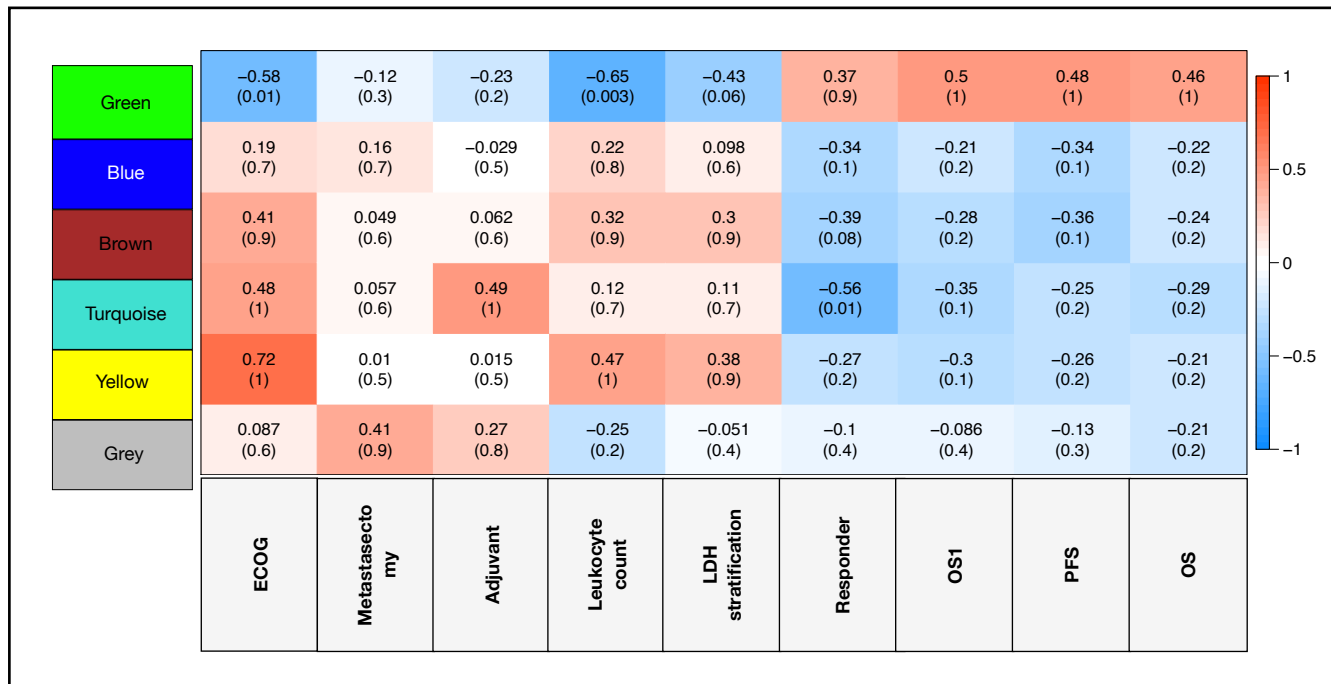

**Table S3a. Module-trait relationships (T0).** In each row, module of colors with different gene co-expression. In each column, clinical variables. The relationship between the two is shown and the statistical significance (Benjamini-Hochberg adjusted p-value) in brackets.

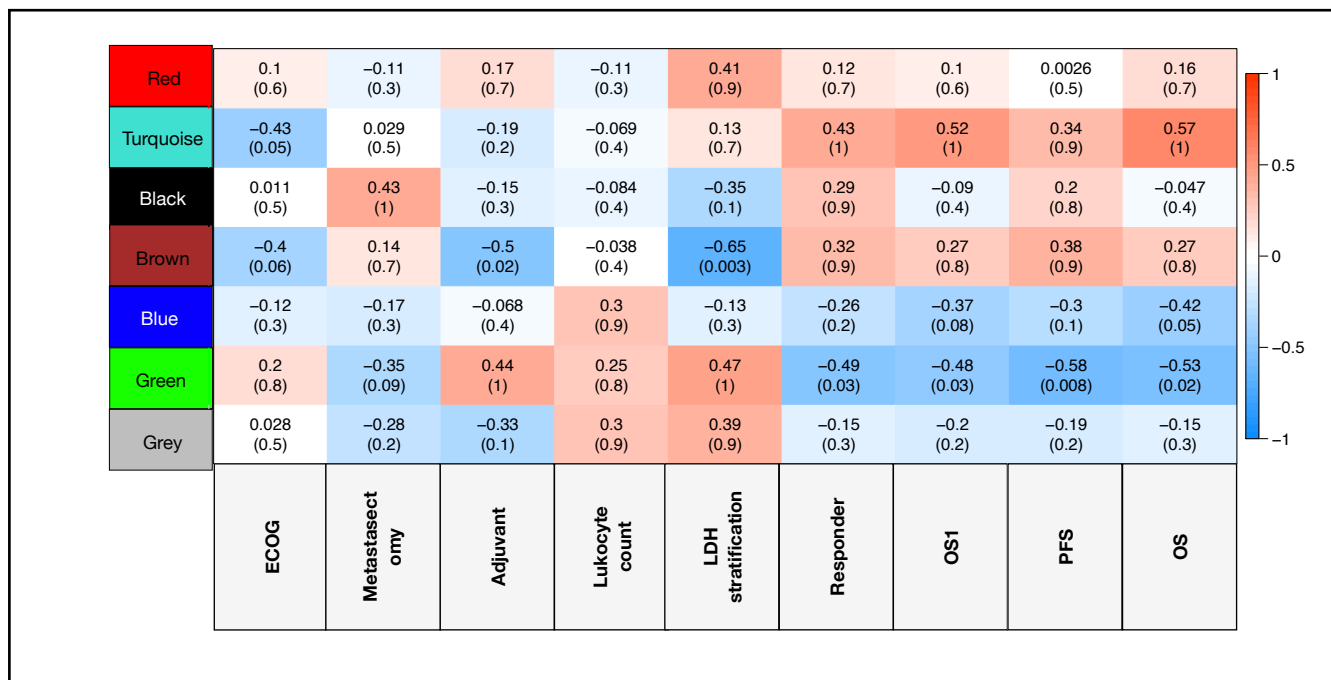

**Table S3b. Module-trait relationships (T1).** In each row, module of colors with different gene co-expression. In each column, clinical variables. The relationship between the two is shown and the statistical significance (p) in brackets.

| geneSymbol | GS.Responder | p.GS.Responder | MM.turquoise | p.MM.turquoise |
|------------|--------------|----------------|--------------|----------------|
| EBI3       | -0.6433      | 0.0097         | 0.8027       | 0.0003         |
| PDCD1LG2   | -0.6460      | 0.0093         | 0.8845       | 0.0000         |
| IL13RA2    | 0.6547       | 0.0081         | -0.7070      | 0.0032         |
| MERTK      | 0.6686       | 0.0064         | -0.7204      | 0.0025         |
| MICB       | -0.7429      | 0.0015         | 0.7118       | 0.0029         |
| CD70       | 0.6340       | 0.0111         | -0.8365      | 0.0001         |
| F2RL1      | -0.7285      | 0.0021         | 0.7556       | 0.0011         |
| HRAS       | -0.7263      | 0.0022         | 0.7959       | 0.0003         |
| CXCR5      | -0.7177      | 0.0026         | 0.8482       | 0.0000         |
| SMAD2      | -0.7177      | 0.0026         | 0.8482       | 0.0000         |
| NFATC1     | -0.6036      | 0.0172         | 0.8990       | 0.0000         |
| NOD1       | -0.6033      | 0.0173         | 0.9238       | 0.0000         |
| SPACA3     | -0.6892      | 0.0045         | 0.9183       | 0.0000         |

**Table S4a- Turquoise module-** Information on genes associated with responder at T0.

*GS.Responder*: Gene Significance: correlation between gen expression and clinical variable (responder).

*p.GS.Responder*: p-value of GS.

*MM*: Module membership: degree of belonging of the gene to each module, measured by the correlation between the expression profile of the gene and the expression profiles of the rest of the genes in the module.

| geneSymbol | GS.PFS  | p.GS.PFS | MM.green | p.MM.green |
|------------|---------|----------|----------|------------|
| PLAU       | -0.5400 | 0.0308   | 0.8079   | 0.0002     |
| SPA17      | -0.5182 | 0.0397   | 0.9296   | 0.0000     |
| TNFRSF10B  | -0.6417 | 0.0074   | 0.8638   | 0.0000     |
| GPI        | -0.6079 | 0.0125   | 0.9135   | 0.0000     |
| CCL24      | -0.5796 | 0.0186   | 0.7532   | 0.0008     |
| IFI16      | -0.6354 | 0.0082   | 0.9293   | 0.0000     |
| CCL8       | -0.6252 | 0.0096   | 0.8367   | 0.0000     |
| C4BPA      | -0.5116 | 0.0428   | 0.8671   | 0.0000     |
| CD209      | -0.5867 | 0.0169   | 0.9345   | 0.0000     |
| CFP        | 0.5059  | 0.0456   | -0.7357  | 0.0012     |
| CFI        | -0.5665 | 0.0221   | 0.8711   | 0.0000     |
| CD37       | -0.7003 | 0.0025   | 0.8851   | 0.0000     |
| TLR1       | -0.6797 | 0.0038   | 0.7907   | 0.0003     |
| NA         | -0.6700 | 0.0045   | 0.9154   | 0.0000     |
| TICAM2     | -0.6623 | 0.0052   | 0.9717   | 0.0000     |

|          |         |        |         |        |
|----------|---------|--------|---------|--------|
| IL21     | -0.6998 | 0.0025 | 0.9261  | 0.0000 |
| CASP1    | 0.5455  | 0.0288 | -0.8893 | 0.0000 |
| CEBPB    | -0.6357 | 0.0081 | 0.8469  | 0.0000 |
| CXCL3    | 0.5708  | 0.0209 | -0.8275 | 0.0000 |
| LTBR     | -0.5655 | 0.0224 | 0.7998  | 0.0002 |
| CD1A     | -0.6831 | 0.0035 | 0.7924  | 0.0003 |
| EDC3     | -0.6962 | 0.0027 | 0.9333  | 0.0000 |
| BIRC5    | 0.6710  | 0.0044 | -0.7791 | 0.0004 |
| EOMES    | -0.5281 | 0.0355 | 0.9427  | 0.0000 |
| NA       | 0.6593  | 0.0055 | -0.7138 | 0.0019 |
| C7       | -0.6197 | 0.0105 | 0.9131  | 0.0000 |
| PAX5     | -0.5133 | 0.0420 | 0.7229  | 0.0016 |
| CXCL1    | -0.5513 | 0.0268 | 0.9031  | 0.0000 |
| ATG12    | -0.6377 | 0.0079 | 0.8737  | 0.0000 |
| TLR6     | -0.5869 | 0.0169 | 0.8273  | 0.0000 |
| IFNG     | -0.6950 | 0.0028 | 0.8292  | 0.0000 |
| IL21R    | -0.5049 | 0.0461 | 0.8035  | 0.0002 |
| NEFL     | -0.5926 | 0.0156 | 0.8271  | 0.0000 |
| ICAM1    | -0.5885 | 0.0165 | 0.7477  | 0.0009 |
| MAGEC2   | -0.6062 | 0.0128 | 0.7843  | 0.0003 |
| IL1RL1   | -0.5449 | 0.0291 | 0.7576  | 0.0007 |
| CSF3R    | 0.5410  | 0.0304 | -0.7695 | 0.0005 |
| IFIT2    | 0.6222  | 0.0101 | -0.8191 | 0.0001 |
| TAB1     | 0.6058  | 0.0129 | -0.8305 | 0.0000 |
| ULBP2    | -0.5172 | 0.0402 | 0.7560  | 0.0007 |
| HLA-DRB3 | -0.6189 | 0.0106 | 0.7831  | 0.0003 |
| CD46     | -0.5139 | 0.0417 | 0.7353  | 0.0012 |
| NA       | 0.6047  | 0.0131 | -0.7797 | 0.0004 |
| ATF2     | -0.5458 | 0.0287 | 0.7282  | 0.0014 |

**Table S4b- Green module-** Information on genes associated with PFS at T1

| geneSymbol | GS.LDH | p.GS.LDH | MM.brown | p.MM.brown |
|------------|--------|----------|----------|------------|
| TANK       | 0.7748 | 0.0004   | -0.9069  | 0.0000     |
| CCL3L1     | 0.7725 | 0.0005   | -0.8549  | 0.0000     |

|           |         |        |         |        |
|-----------|---------|--------|---------|--------|
| HLA-DPA1  | 0.7442  | 0.0009 | -0.9178 | 0.0000 |
| CD1D      | 0.7389  | 0.0011 | -0.9223 | 0.0000 |
| CD3G      | 0.7175  | 0.0018 | -0.9603 | 0.0000 |
| PLAU      | 0.7152  | 0.0018 | -0.8931 | 0.0000 |
| CD48      | 0.7094  | 0.0021 | -0.7553 | 0.0007 |
| IFNB1     | 0.7004  | 0.0025 | -0.8615 | 0.0000 |
| DDX58     | 0.6890  | 0.0032 | -0.8970 | 0.0000 |
| BAGE      | 0.6790  | 0.0038 | -0.8045 | 0.0002 |
| CD14      | 0.6749  | 0.0041 | -0.8626 | 0.0000 |
| PSMB7     | 0.6729  | 0.0043 | -0.9158 | 0.0000 |
| CTSG      | -0.6694 | 0.0046 | 0.9058  | 0.0000 |
| TNFRSF10B | 0.6588  | 0.0055 | -0.8603 | 0.0000 |
| PSMD7     | 0.6578  | 0.0056 | -0.7728 | 0.0004 |
| CYFIP2    | -0.6575 | 0.0056 | 0.9295  | 0.0000 |
| TIRAP     | -0.6575 | 0.0056 | 0.9547  | 0.0000 |
| BLNK      | 0.6572  | 0.0057 | -0.9314 | 0.0000 |
| IRAK4     | 0.6568  | 0.0057 | -0.8075 | 0.0002 |
| SPO11     | -0.6564 | 0.0058 | 0.7994  | 0.0002 |
| CARD9     | -0.6476 | 0.0067 | 0.9356  | 0.0000 |
| TLR3      | -0.6454 | 0.0069 | 0.8714  | 0.0000 |
| IL10RA    | 0.6431  | 0.0072 | -0.8268 | 0.0000 |
| CD55      | 0.6397  | 0.0076 | -0.7589 | 0.0007 |
| IL22      | 0.6372  | 0.0079 | -0.8366 | 0.0000 |
| HLA-A     | 0.6360  | 0.0081 | -0.8100 | 0.0001 |
| APOE      | -0.6337 | 0.0084 | 0.9476  | 0.0000 |
| CD33      | -0.6205 | 0.0103 | 0.9213  | 0.0000 |
| CCL27     | -0.6192 | 0.0105 | 0.9226  | 0.0000 |
| CSF2      | 0.6190  | 0.0106 | -0.7693 | 0.0005 |
| GPI       | 0.6142  | 0.0114 | -0.7924 | 0.0003 |
| CCL28     | -0.6110 | 0.0119 | 0.7807  | 0.0004 |
| DPP4      | -0.6098 | 0.0121 | 0.9373  | 0.0000 |
| CCR2      | 0.6090  | 0.0123 | -0.7835 | 0.0003 |
| ATG10     | 0.6090  | 0.0123 | -0.9081 | 0.0000 |
| CCL24     | 0.6084  | 0.0124 | -0.8735 | 0.0000 |

|           |         |        |         |        |
|-----------|---------|--------|---------|--------|
| TNFRSF11A | -0.6075 | 0.0126 | 0.8155  | 0.0001 |
| CTCFL     | 0.6074  | 0.0126 | -0.7538 | 0.0007 |
| TNFSF18   | -0.6014 | 0.0137 | 0.7803  | 0.0004 |
| IFI16     | 0.6004  | 0.0139 | -0.7305 | 0.0013 |

**Table S4c- Brown module-** Information on genes associated with LDH stratification at T1
